# Supplementary material for: Analgesic Effect of Acupuncture Is Mediated via Inhibition of JNK Activation in Astrocytes after Spinal Cord Injury
Source: PubMed Central journal article supplement (PMC3767587; doi:10.1371/journal.pone.0073948), 2013-09-09

**Figure S1**

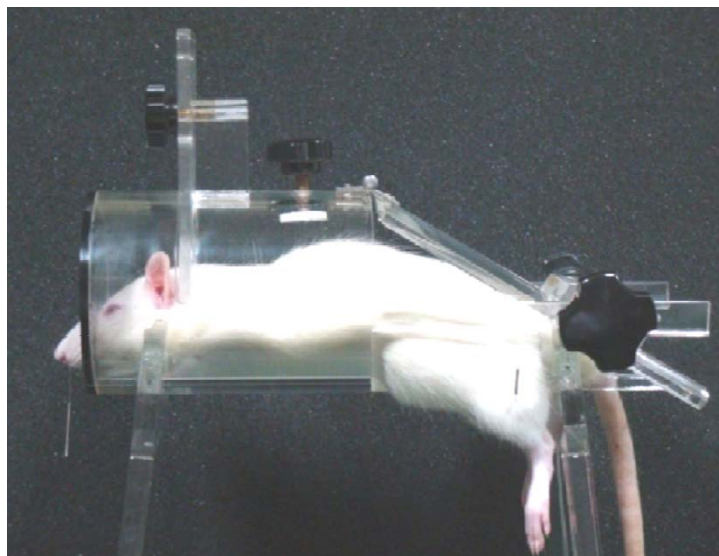

Supplement: pone.0073948.s001.pdf [file pone.0073948.s001.pdf]
